# Supplementary material
Source: PubMed Central journal article supplement (PMC3400343)
Supplement: NIHMS382732-supplement-Supplementary_Data.pdf [file NIHMS382732-supplement-Supplementary_Data.pdf]

Supporting information

## Gold nanostars: surfactant-free synthesis, 3-D modelling, and two-photon luminescence imaging

Hsiangkuo Yuan<sup>1§</sup>, Christopher G Khoury<sup>1§</sup>, Hanjun Hwang<sup>1</sup>, Christy M Wilson<sup>2</sup>, Gerald A Grant<sup>2</sup>  
and Tuan Vo-Dinh<sup>1,3,4\*</sup>

<sup>1</sup> Department of Biomedical Engineering, Duke University, Durham, NC 27708, USA

<sup>2</sup> Department of Surgery, Division of Neurosurgery, Duke University Medical Center, Durham, NC.

<sup>3</sup> Department of Chemistry, Duke University, Durham, NC 27708, USA

<sup>4</sup> Fitzpatrick Institute for Photonics, Duke University, Durham, NC 27708, USA

<sup>§</sup> These authors contributed equally

\* Email: [tuan.vodinh@duke.edu](mailto:tuan.vodinh@duke.edu)

Surfactant-free synthesis and plasmon tunability of nanostars

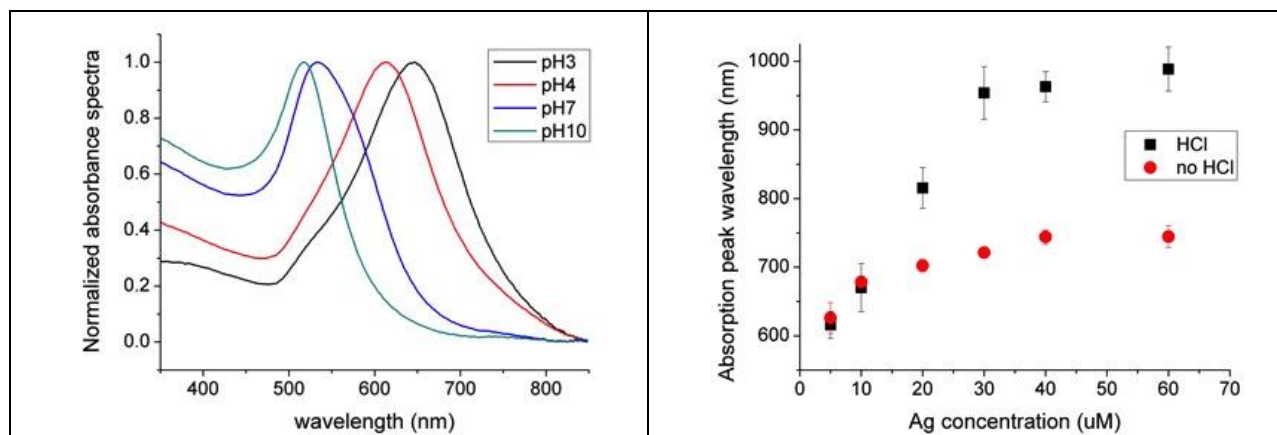

**Figure 1:** pH effect on the growth of nanostars. (left) Normalized spectra (pH 3~10: brown, red, blue, green line) of nanostars synthesized under different pH buffer (20 mM). The plasmon red-shifted the most under an acidic environment. (right) Plasmon peak position of nanostars, from different  $\text{Ag}^+$  concentrations, synthesized with (black square) and without (red circle) the addition of  $10 \mu\text{l}$  1N HCl.

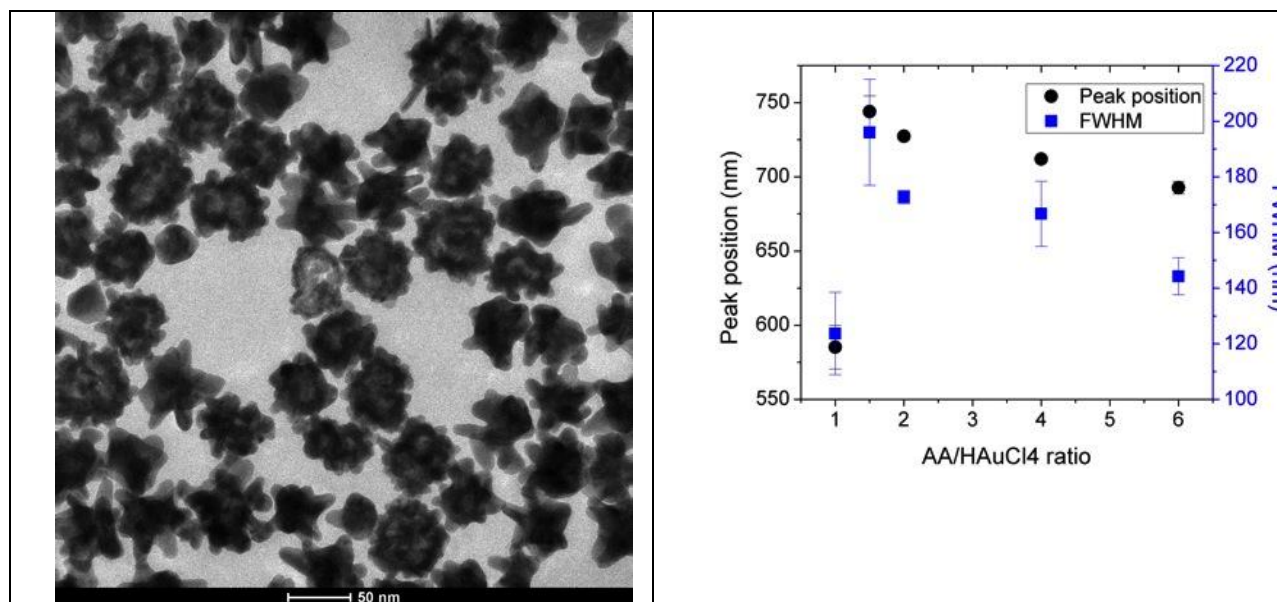

**Figure 2:** AA/HAuCl<sub>4</sub> ratio effect on the growth of nanostars. (left) TEM image of particles formed at AA/HAuCl<sub>4</sub> ratio of 6. Particles were flower-shape instead of star-shape. (right) Plasmon peak position (black circle) and FWHM (blue square) of the absorbance spectra on nanostar synthesized by different AA/HAuCl<sub>4</sub> ratio. Ascorbic acid at 1.5~2x molar ratio to HAuCl<sub>4</sub> resulted in the most red-shifted plasmon peak position. As previously shown, 1x and higher (>3x) ratio leads to the formation of polydisperse particles and short-branched nanoflowers respectively<sup>2,3</sup>.

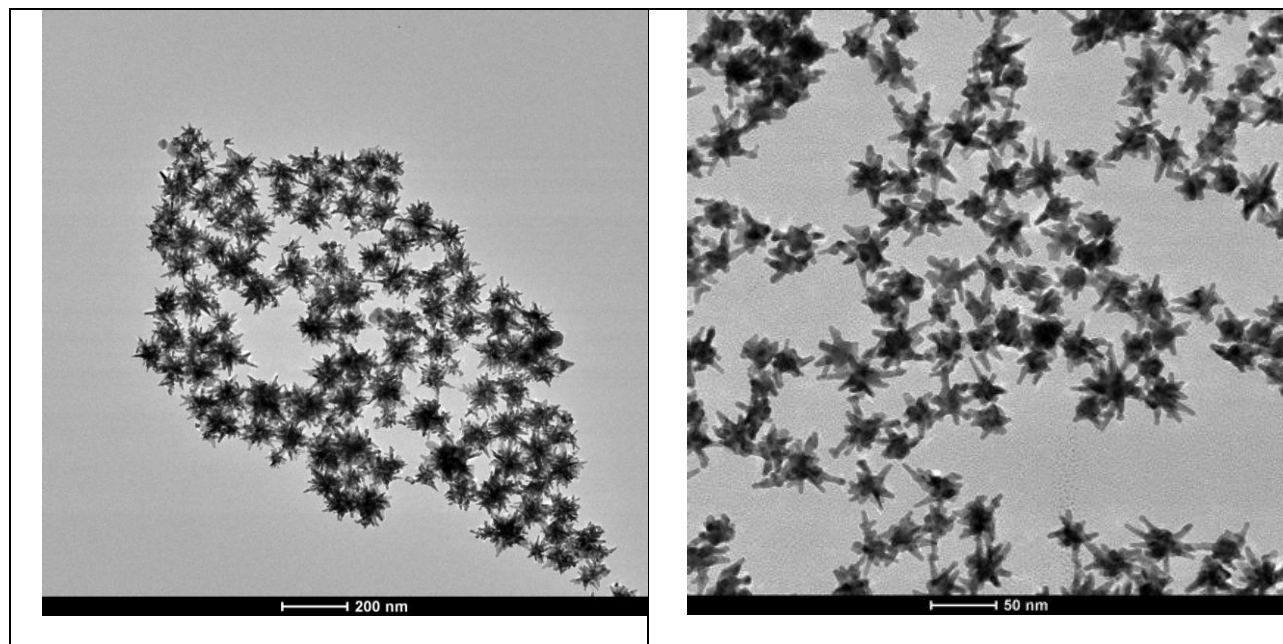

**Figure 3:** Effect of the seed amount on growth of nanostars. TEM images of nanostars made from no seed (left) and 400  $\mu$ l (right) of seeds under 30  $\mu$ M of silver nitrate. The average size was larger than 100 nm without seed and less than 50nm with 4-fold amount of seeds.

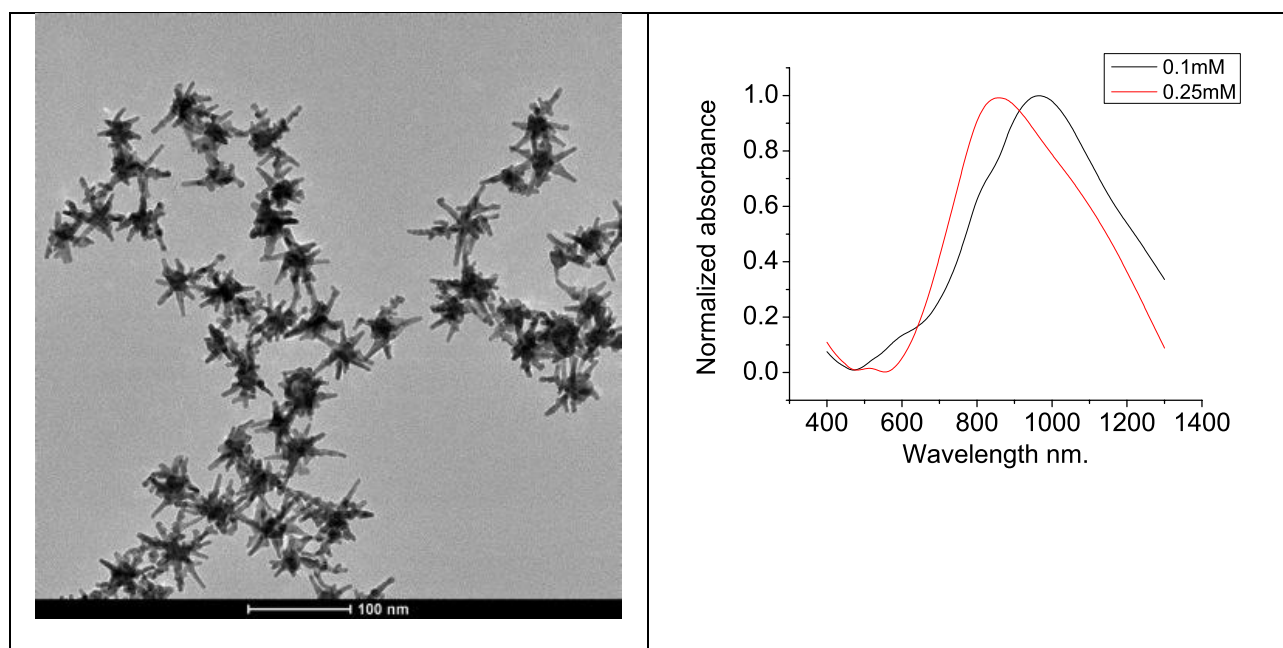

**Figure 4:** Effect of HAuCl<sub>4</sub> concentration on growth of nanostar. (left) TEM image of nanostars made from 0.1 mM HAuCl<sub>4</sub> and 20  $\mu$ M of AgNO<sub>3</sub>. The core size is roughly 10 nm smaller and the branches are thinner than the one made from 0.25 mM HAuCl<sub>4</sub>. (right) Normalized absorbance spectra of nanostars made from 0.1 mM (grey line) and 0.25 mM (red line) HAuCl<sub>4</sub>. Nanostars with smaller core has more red-shifted plasmon spectrum.

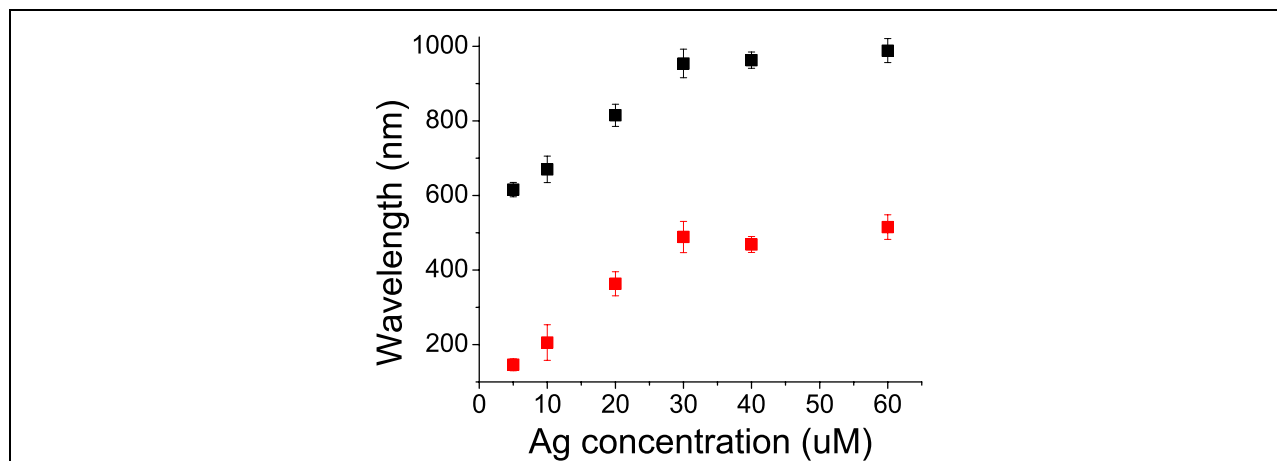

**Figure 5.** The spectral progression of plasmon peak (black square) and FWHM (red square) of nanostars formed under different  $\text{Ag}^+$  concentrations.

*Polarization-averaged 3-D nanostar modelling*

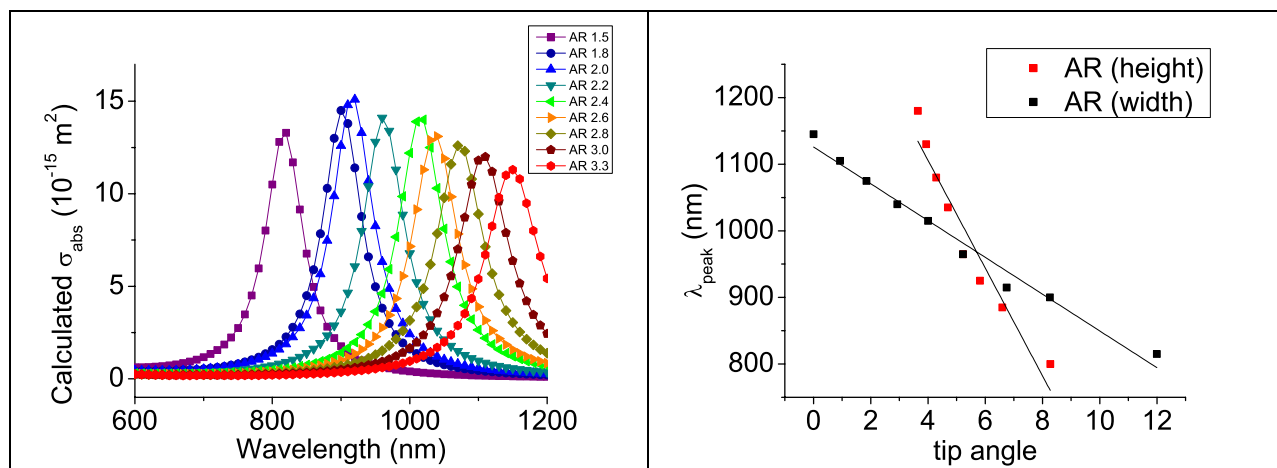

**Figure 6.** (left) The scatter plots of polarization-averaged absorption against aspect ratio (AR) tuned by branch base width while keeping the branch height, core/tip diameter and branch number constant. (right) Relationship between plasmon peak position and tip angle tuned by branch height (red,  $R^2=0.928$ ) and base width (black,  $R^2=0.979$ ).

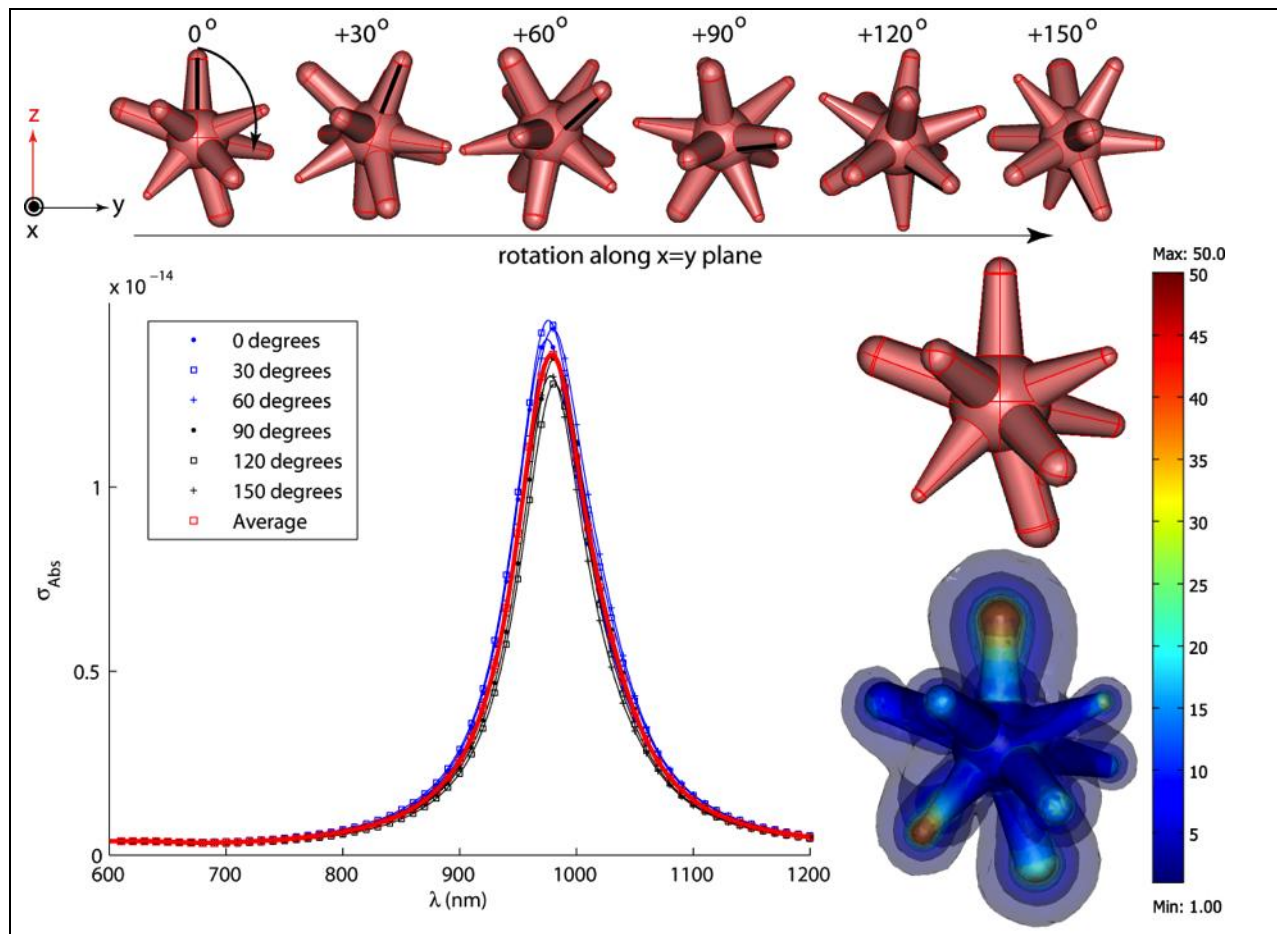

**Figure 7.** Polarization-averaged absorption spectra of nanostar of 10 branch with various tip radius of curvature but the same approximate aspect ratio (Table below). The 3-D spatial solution of  $|E_z|$  are evaluated at  $\lambda=960\text{nm}$ .

**Tip radius of curvature of 10 branches**

| Branch # | Length (nm) | Base Width (nm) | Angle ( $^\circ$ ) | Tip radius (nm) | Aspect Ratio (L/W) |
|----------|-------------|-----------------|--------------------|-----------------|--------------------|
| 1        | 23.4        | 5.0             | 1.0                | 4.72            | 2.34               |
| 2        | 23.0        | 5.0             | 2.0                | 4.40            | 2.30               |
| 3        | 22.7        | 5.0             | 3.0                | 4.08            | 2.27               |
| 4        | 22.4        | 5.0             | 4.0                | 3.75            | 2.24               |
| 5*       | 22.0        | 5.0             | 5.0                | 3.35            | 2.20               |
| 6        | 21.8        | 5.0             | 6.0                | 3.10            | 2.18               |
| 7        | 21.4        | 5.0             | 7.0                | 2.75            | 2.14               |
| 8        | 21.1        | 5.0             | 8.0                | 2.44            | 2.11               |
| 9        | 20.8        | 5.0             | 9.0                | 2.10            | 2.08               |
| 10       | 20.4        | 5.0             | 10.0               | 1.77            | 2.04               |

\*original S30 branch dimensions



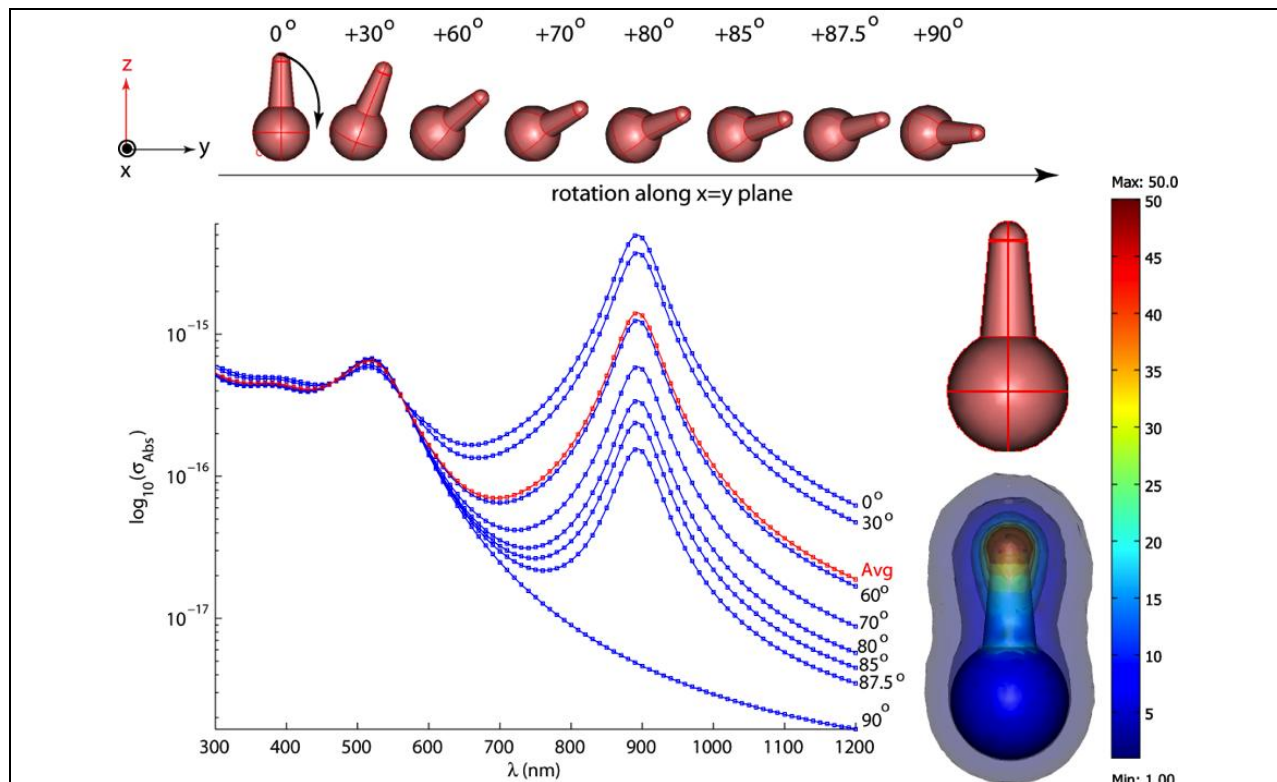

**Figure 8:** Numerically solved polarization-averaged absorption spectra for a single-branched nanostar. The 3-D spatial solutions of  $|E_z|$  are evaluated at  $\lambda=960\text{nm}$ .

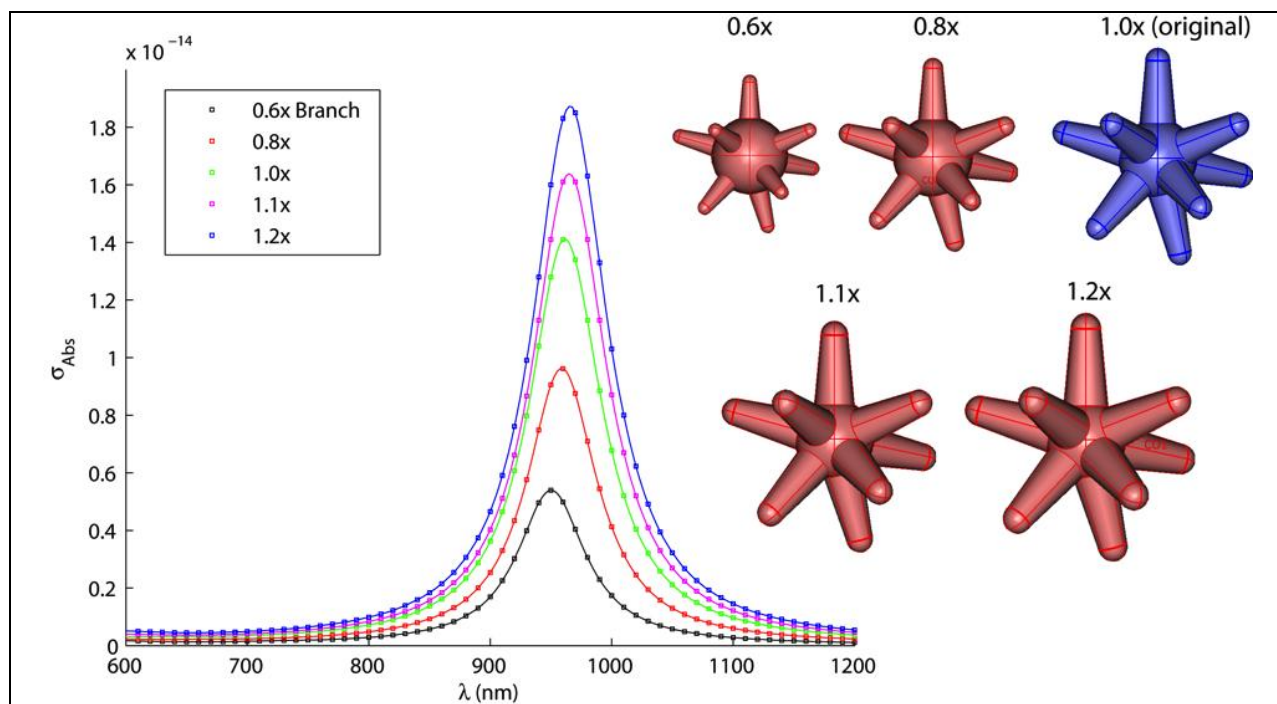

**Figure 9.** Polarization-averaged absorption spectra as a function of branch length (keeping the aspect ratio constant) of S30 nanostar. Longer branch length results in higher peak intensity but no significant plasmon shift.

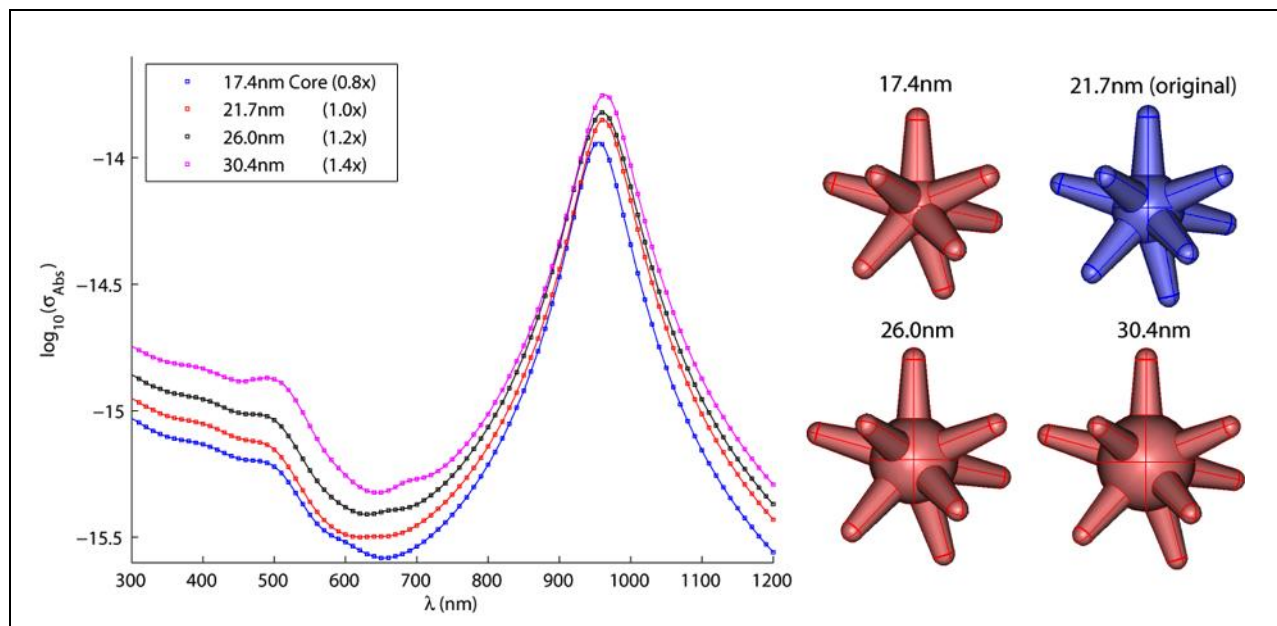

**Figure 10:** Absorption spectra as a function of nanostar core diameter. The core diameter affects primarily the plasmon near 520 nm.

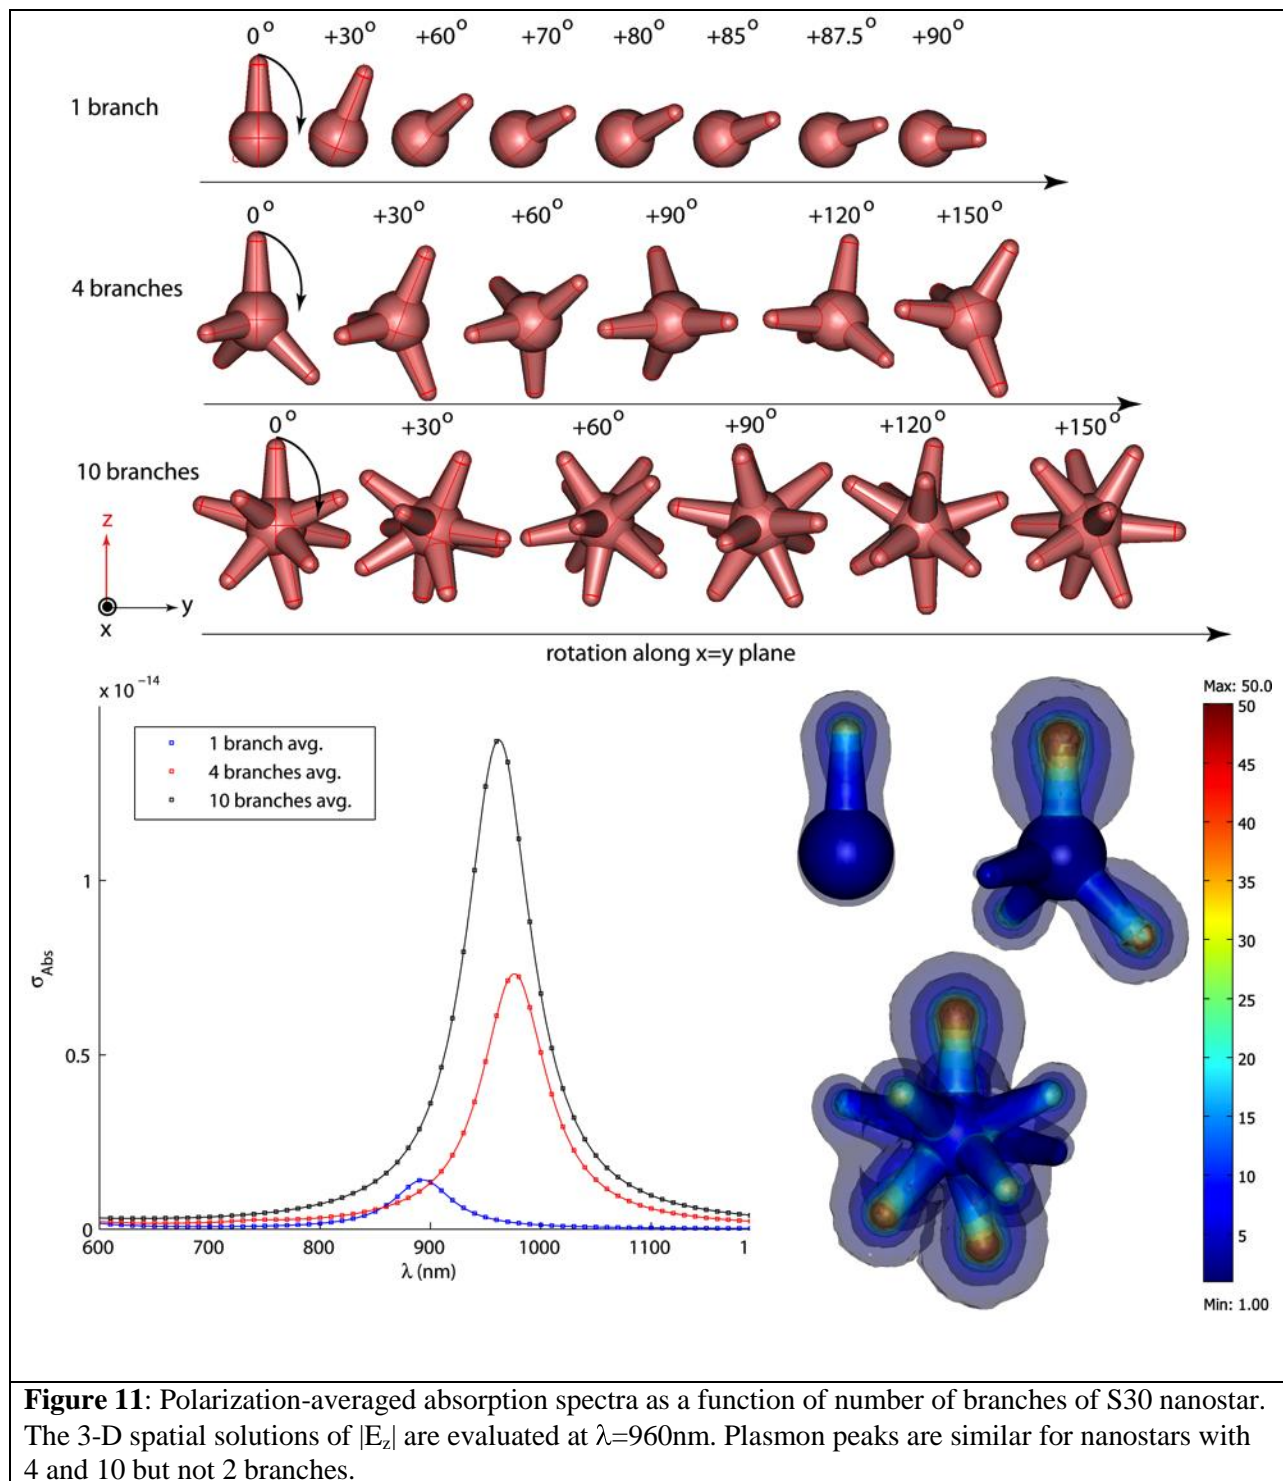



**Table 1.** Structural features of nanostars produced under different Ag<sup>+</sup> concentrations

| Ag <sup>+</sup><br>( $\mu$ M) | Hydrodynamic size<br>(nm) | Core diameter<br>(nm) | Branch length<br>(nm) | Branch base<br>width (nm) | Tip diameter<br>(nm) | Branch<br>number | Estimated surface area via<br>simulation (nm <sup>2</sup> ) |
|-------------------------------|---------------------------|-----------------------|-----------------------|---------------------------|----------------------|------------------|-------------------------------------------------------------|
| 5                             | 50 $\pm$ 24               | 28.4 $\pm$ 2.6        | 13.1 $\pm$ 5.0        | 18.5 $\pm$ 3.1            | 11.1 $\pm$ 1.5       | 4.2 $\pm$ 1.9    | 3416                                                        |
| 10                            | 51 $\pm$ 21               | 28.2 $\pm$ 3.1        | 14.7 $\pm$ 4.3        | 16.4 $\pm$ 3.3            | 9.4 $\pm$ 1.4        | 6.4 $\pm$ 1.4    | 4665                                                        |
| 20                            | 59 $\pm$ 21               | 23.7 $\pm$ 2.4        | 19.0 $\pm$ 5.1        | 13.5 $\pm$ 2.4            | 7.8 $\pm$ 1.3        | 7.8 $\pm$ 1.1    | 5202                                                        |
| 30                            | 67 $\pm$ 24               | 21.7 $\pm$ 3.6        | 20.9 $\pm$ 5.1        | 10.1 $\pm$ 2.0            | 6.5 $\pm$ 1.4        | 9.9 $\pm$ 2.4    | 5924                                                        |

Hydrodynamic sizes were obtained using the NanoSight measurements. Other structural features were measured from TEM images manually using ImageJ software. Surface area was calculated from the simulation geometry.

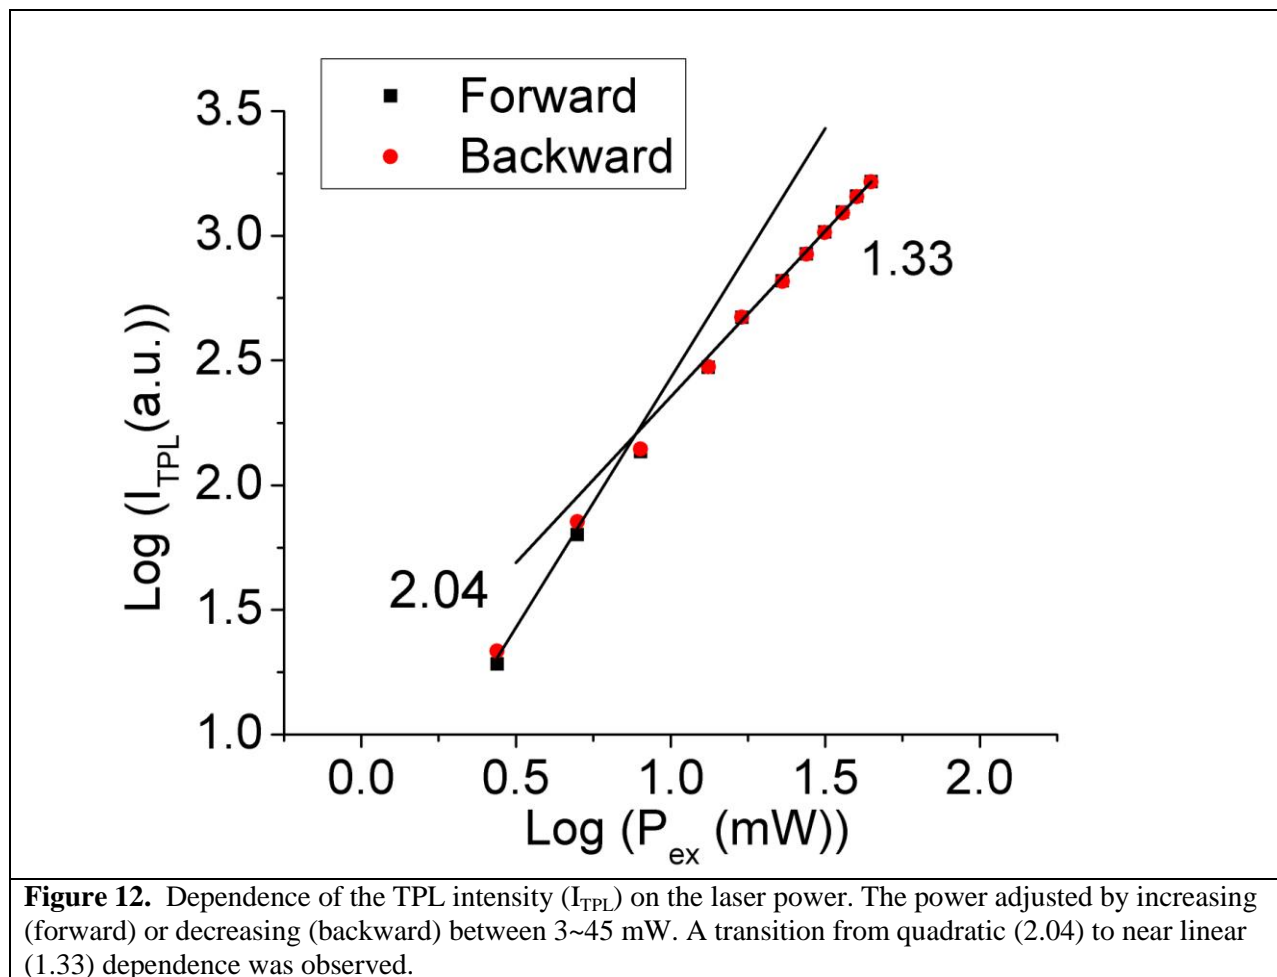

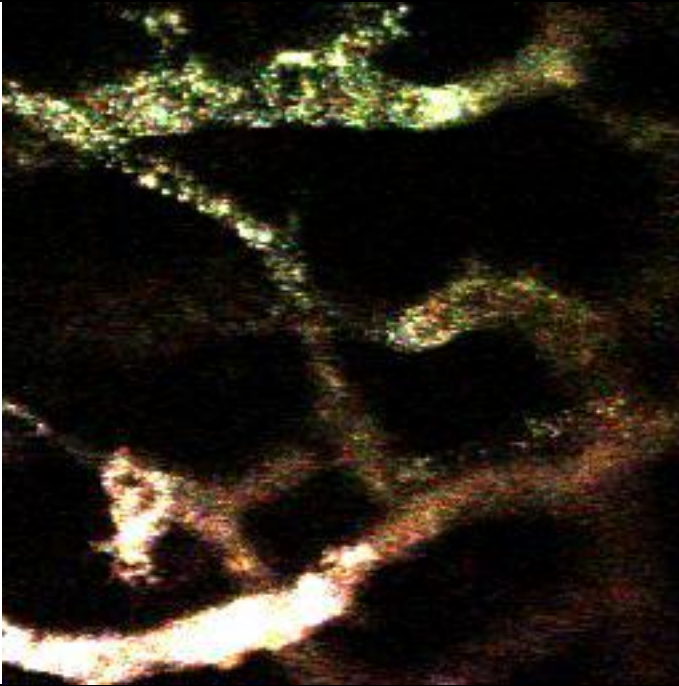

**Movie 1.** TPL imaging through dorsal window chamber 30 min after nanostars injection. The time-series was taken under 3% laser transmission at 2.3 frame per second ( $256 \times 256$  resolution) with a scanning area of  $145 \times 145 \mu\text{m}^2$ . The movie shows the flow of PEGylated gold nanostars in the blood vessel.

Reference:

1. Ji, X.; Song, X.; Li, J.; Bai, Y.; Yang, W.; Peng, X., Size control of gold nanocrystals in citrate reduction: The third role of citrate. *J. Am. Chem. Soc.* **2007**, *129* (45), 13939-13948.
2. Ahmed, W.; Kooij, E.; Silfhout, A.; Poelsema, B., Controlling the morphology of multi-branched gold nanoparticles. *Nanotechnology* **2010**, *21*, 125605.
3. Kawamura, G.; Yang, Y.; Fukuda, K.; Nogami, M., Shape control synthesis of multi-branched gold nanoparticles. *Mater. Chem. Phys.* **2009**, *115* (1), 229-234.
